# Supplementary material for: Ultrathin MoS2–MoO3 nanosheets functionalized CdS photoanodes for effective charge transfer in photoelectrochemical (PEC) cells
Source: Royal Society of Chemistry journal article supplement (doi:10.1039/c6ta09122a), 2016-12-05
Supplement: c6ta09122a1.pdf [file c6ta09122a1.pdf]

## Supplementary Information

### Ultrathin $\text{MoS}_2\text{-MoO}_3$ nanosheets functionalized CdS photoanodes for effective charge transfer in a photoelectrochemical cell

A. Pareek<sup>a,b</sup> H.G.Kim,<sup>c</sup> P. Paik<sup>b</sup> and P. H. Borse<sup>a</sup>

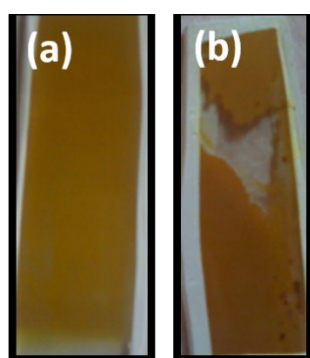

Figure SI 1. Photograph of spray deposited CdS thin film modified with  $\text{MoS}_2\text{-MoO}_3$  for (a) 7 min impregnation time (b) 9 min impregnation time

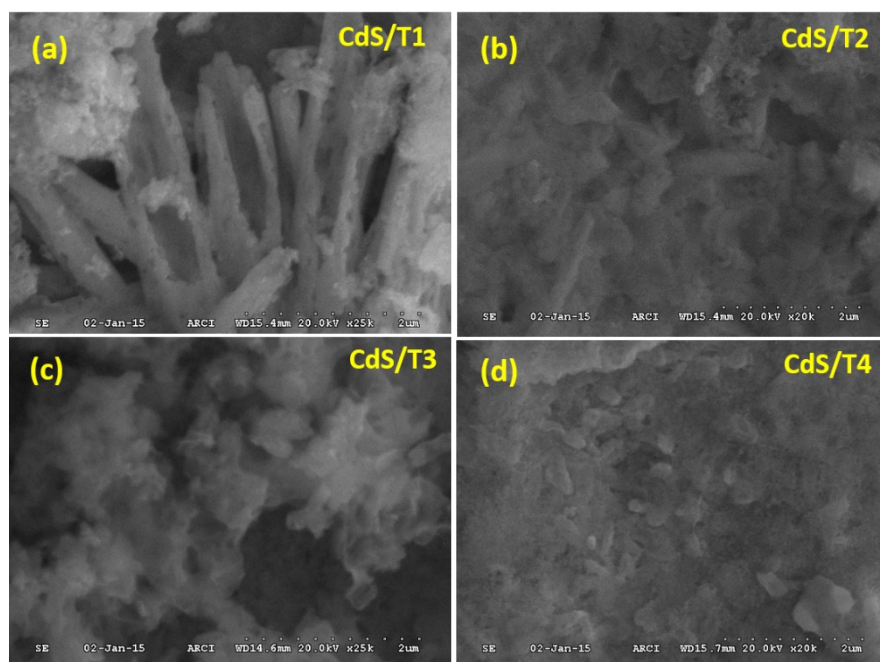

Figure SI 2. FESEM images of CdS modified with  $\text{MoS}_2\text{-MoO}_3$  nanostructures synthesized at different reaction time (T1-10 hrs, T2-15 hrs, T3-24 hrs and T4-36 hrs).

### 1.1 Preparation of exfoliated MoS<sub>2</sub> nanostructures

MoS<sub>2</sub> powder purchased from sigma Aldrich was used for the preparation of exfoliated MoS<sub>2</sub> nanostructures. As received powder was dispersed in aqueous solution with concentration varying from 5 to 20 wt %. The above prepared dispersion was ultrasonicated for different time period viz. 30 min, 60 min and 90 min. The exfoliated MoS<sub>2</sub> nanostructures were then obtained and used for modification of CdS surface.

The surface of CdS thin films was modified with exfoliated MoS<sub>2</sub> dispersion by simple chemical impregnation method.

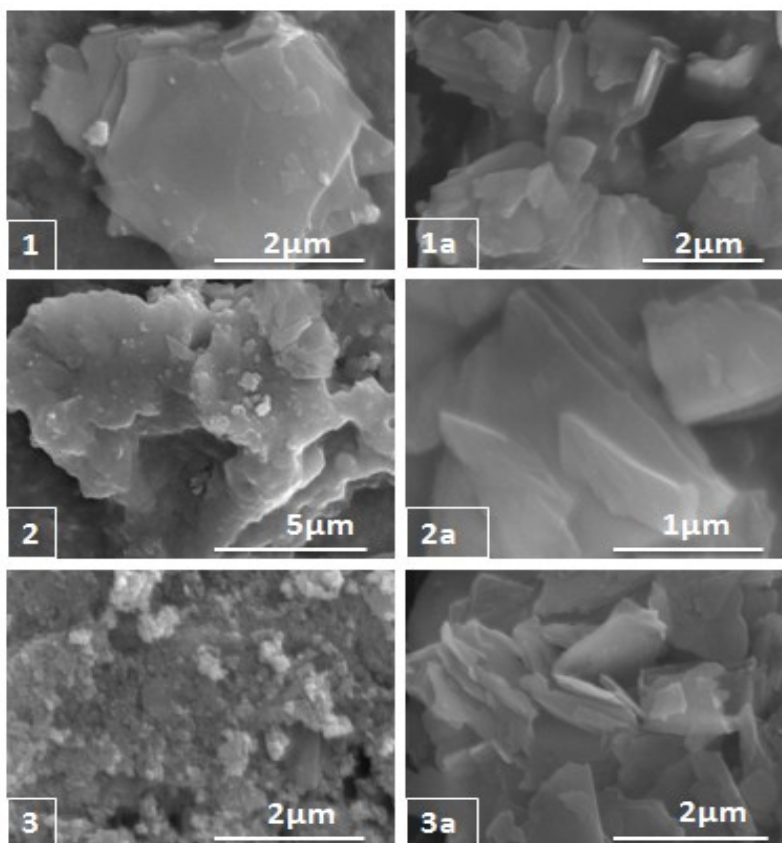

Figure SI 3. FESEM images of CdS modified with MoS<sub>2</sub> (1-3) with its corresponding exfoliated MoS<sub>2</sub> dispersions (1a-3a) of varying sonication time of 30, 60 & 90 min

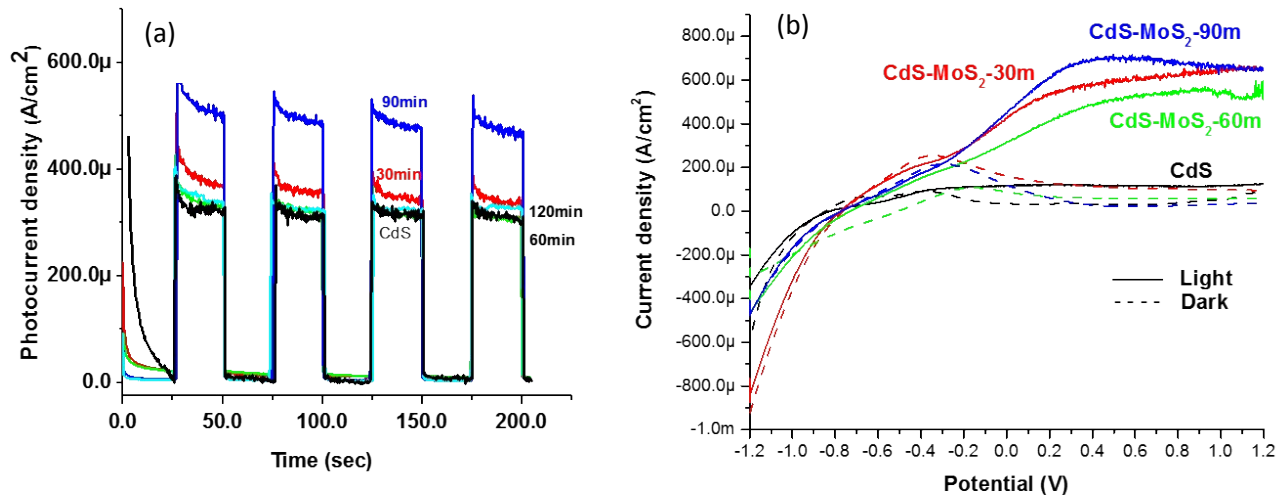

Figure SI 4 (a) Chronoamperometric curve at 0.2V (b) IV curve of CdS modified with exfoliated MoS<sub>2</sub> for different sonication time.

### 1.2 Solar to hydrogen conversion efficiency (STH)

STH ( $\eta_{STH}$ ) was calculated for bare CdS and the most stable modified electrode at 0.2 V / SCE using following equation (1 & 2) [5]:

$$\eta_{STH} (\%) = \frac{(V_{rev} - V_{app}) * J_p}{I_0} * 100 \quad \dots\dots\dots (1)$$

Here  $V_{rev}$  is standard reversible potential *i.e.* 1.23 V,  $I_0$  is power intensity of source *i.e.* 80 mWcm<sup>2</sup> and

$$V_{app} = V_{meas} - V_{oc} \quad \dots\dots\dots (2)$$

Where,  $V_{oc}$  is open circuit potential and  $V_{meas}$  is the potential at which photocurrent measurements are carried out with respect to a reference electrode (SCE).

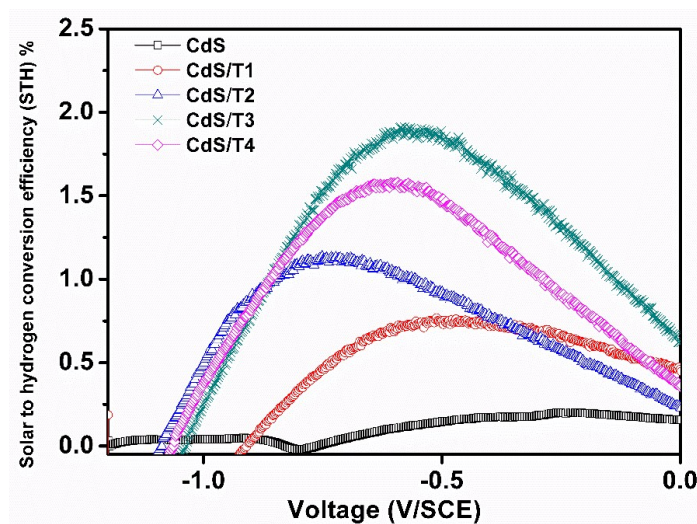

Figure S5. STH variation with applied bias of CdS thin photoanode modified with MoS<sub>2</sub>-MoO<sub>3</sub> nanostructures synthesized at different reaction time (T1-10 hrs, T2-15 hrs, T3-24 hrs and T4-36 hrs)

### 1.3 Incident photon to current conversion efficiency (IPCE)

IPCE is one of the most important characterizations for PEC devices. It describes the photocurrent collected per incident photon flux as a function of illumination wavelength.

IPCE was calculated for bare CdS and modified electrodes using the equation (3) [5]:

$$IPCE = \frac{1240 * J_{ph}}{P * \lambda} \dots\dots\dots (3)$$

Where  $J_{ph}$  the photocurrent density in  $\text{mAcm}^{-2}$ , P is power of source in  $\text{mWcm}^{-2}$  and  $\lambda$  is wavelength in nm.

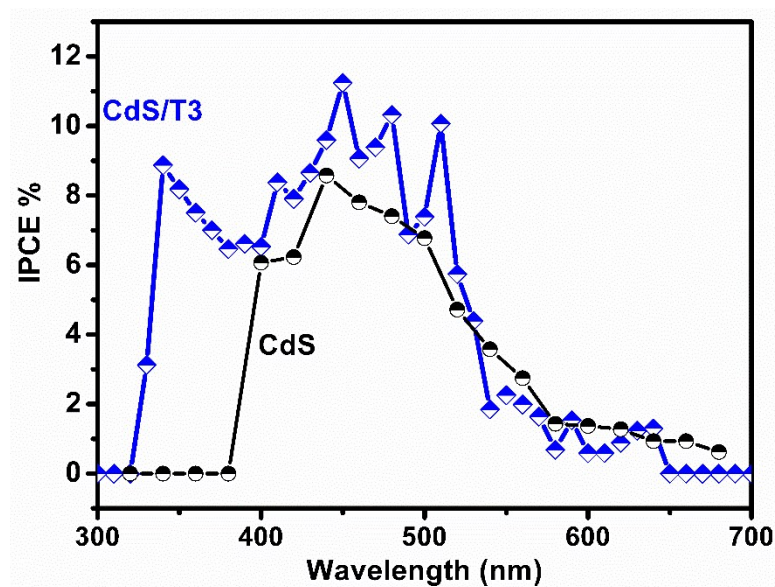

Figure SI 6 IPCE measurements of CdS and CdS/T3 films.

#### 1.4 Electrochemical impedance spectroscopy (EIS)

Electrochemical impedance spectroscopy was carried out to understand the charge transfer mechanism between photoelectrode and electrolyte using electrochemical workstation (PARSTAT 2273 Model). All the measurements were carried out in dark at an applied bias of 10 mV.

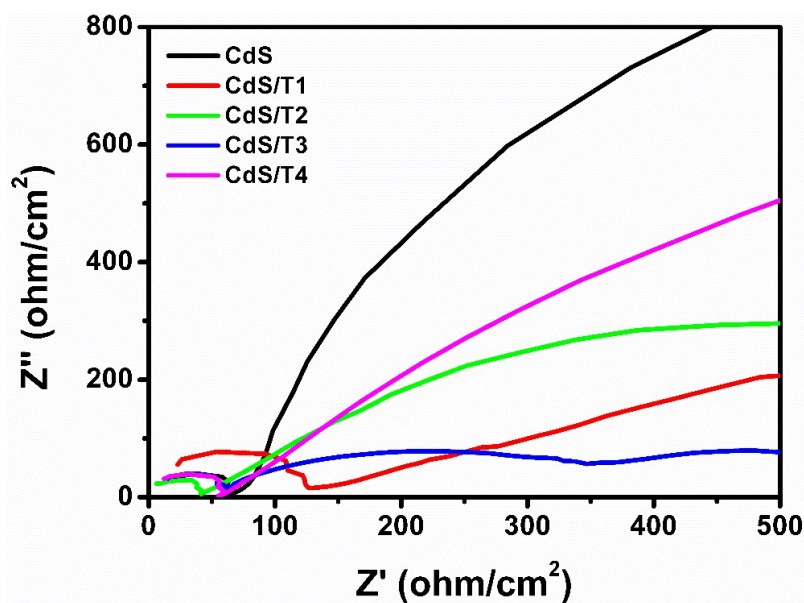

Figure SI 7. EIS of CdS thin film modified with  $\text{MoS}_2\text{-MoO}_3$  nanostructures synthesized at different reaction time (T1-10 hrs, T2-15 hrs, T3-24 hrs and T4-36 hrs)

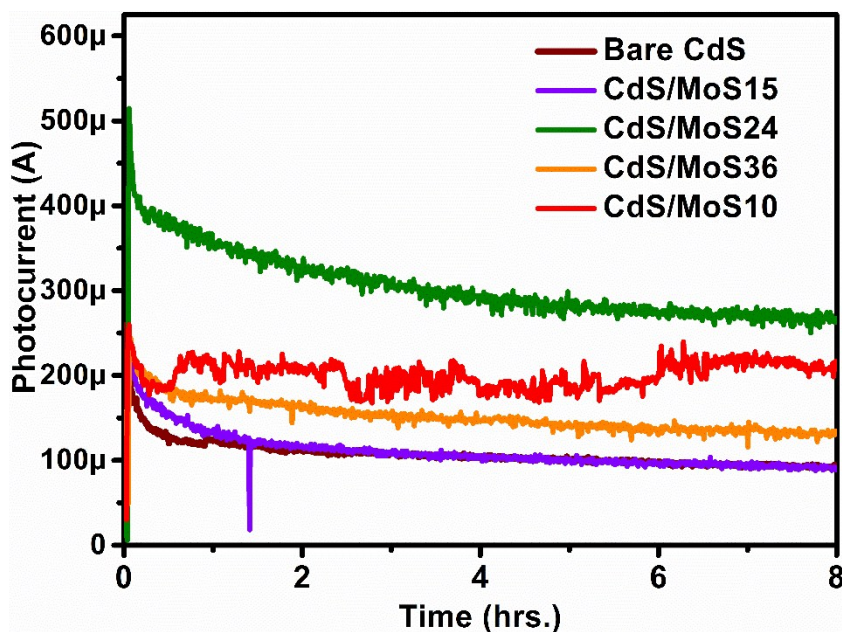

Figure SI 8. Stability of CdS thin film modified with  $\text{MoS}_2\text{-MoO}_3$  nanostructures synthesized at different reaction time (T1-10 hrs, T2-15 hrs, T3-24 hrs and T4-36 hrs)
